# Supplementary material for: Synergistic effects of foliar applied glycine betaine and proline in enhancing rice yield and stress resilience under salinity conditions
Source: PeerJ. 2025 Mar 12;13:e18993. doi: 10.7717/peerj.18993 (PMC11913015; doi:10.7717/peerj.18993)
Supplement: Supplemental Information 1 [file peerj-13-18993-s001.xlsx]

## Sheet: Sheet1
rep	a	b	dryweight		PH	PH	TILNUM	TIL NUM	NSM		BY	BY	GW	GW	HARVEST INDEX	HARVEST INDEX	nospikletsspike	NTS	spike length	SL	1000 g.w	Amylose	x9	protien	x10
rep	a	b	DW	DW	PH	PH	TN	TN	NSM	NSM	BY	BY	GY	GY	HI	HI	NSS	NSS	SL	SL	TKW	AMY	AMY	PC	PC	DW	DW	PH	PH	TN	TN	LA	NSM	NSM	BY	BY	GY	GY	HI	HI	NSS	NSS	SL	SL	NGS	Chloro	Chloro	TKW	AMY
1	CK	ck	108	104	53.3333	55	7	7	137.66	134	5.78	5.78	1.847	1.7367	31.955	30.0467	6	6	10.3333	11	25	14	13	6.31	6
2	CK	ck	105	105	57.3333	62	6	4	138.66	138	5.62	4.62	1.848	1.98	32.8826	42.8571	6	7	10.6667	12	26	13	12	7.35	6.4
3	CK	ck	107	106	59	53	5.66667	3	138.33	135	5.82	5.82667	1.98	1.848	34.0206	31.7162	7	6.6	12	11	29	12	11	6.42	6.9	106.667	105	56.5556	56.6667	6.22222	4.66667	10.1667	138.217	135.667	5.74	5.40889	1.89167	1.8549	32.9527	34.8734	6.33333	6.53333	11	11.3333	68.3333	36.7778	36.3333	26.6667	13
1	CK	10GB	111	115	83.3333	89	7	7	147.66	149.66	9.85	8.78	3.22	3.8	32.6904	43.2802	7	9	10.3333	9.6	25	14	14	8.6	8.4
2	CK	10GB	112	112	77.3333	88	6	8	148.66	145.66	9.14	9.02	3	3.67	32.8228	40.6874	6	8	10.6667	11	26	13	13	8.4	8.66
3	CK	10GB	114	117	89	89	5.66667	8	148.33	146.33	9.05	8.85	3.98	4.3	43.9779	48.5876	7	9	12	10	29	12	15	8.2	9	112.333	114.667	83.2222	88.6667	6.22222	7.66667	8.29167	148.217	147.217	9.34667	8.88333	3.4	3.92333	36.497	44.185	6.66667	8.66667	11	10.2	68.3333	37.4444	44.3333	26.6667	13
1	CK	20GB	128	128	68.6667	70	7.33333	7.33333	174	177	8.66	8.61667	3.01	3.21	34.7575	37.2534	12.3333	10.3333	16	16	33	17	19.82	9	7.85
2	CK	20GB	125	129	66.6667	66	8	7	177	170	8.75	9.75333	3.03	3.85	34.6286	39.4737	12.6667	10.6667	14.3333	14.3333	34	15	20.21	9	7.89
3	CK	20GB	130	135	69.3333	68.5	8	9	167	166	8.66	8.00667	3.05	3.09	35.2194	38.5928	11.6667	11.6667	17.3333	17.3333	30	16	20.24	9	7.9	127.667	130.667	68.2222	68.1667	7.77778	7.77778	15.0556	172.667	171	8.69	8.79222	3.03	3.38333	34.8685	38.44	12.2222	10.8889	15.8889	15.8889	87.2222	51.0444	48.15	32.3333	16
1	CK	30GB	134	139	70	72.6667	8.33333	8.66667	181.66	186.66	8.9	8.12	3.12	3.082	35.0562	37.9557	10	9.33333	18	15.3333	40	18.35	18.35	9.36	9
2	CK	30GB	138	136	73	75	6.66667	8	183	185.33	9.93	8.06	3.271	3.171	32.9406	39.3424	11	10	20	16	43	19.21	19.21	9.33	9.97
3	CK	30GB	136	142	73.6667	78	7	11.3333	185.4	184	9.56	9.45	3.54	3.16	37.0293	33.4392	12	9	17.6667	17.6667	44	20.34	20.34	9.52	8.3	136	139	72.2222	75.2222	7.33333	9.33333	16.2889	183.353	185.33	9.46333	8.54333	3.31033	3.13767	35.0087	36.9124	11	9.44444	18.5556	16.3333	87	51.6778	48.2667	42.3333	19.3
1	10P	ck	105	109	57.3333	69.6667	6	6	148.66	147.66	7.62	7.02	2.48	2.09	32.5459	29.7721	6	11.3333	10.6667	17.3333	26	13	18.31	7.35	6.31
2	10P	ck	107	119	59	73	6.66667	7	148.33	147.33	7.82667	7.82667	2.148	2.48	27.4446	31.6865	7	12.3333	12	18.6667	29	12	18.56	6.2	7.35
3	10P	ck	107	120	59	69	5.66667	6	148.33	148.33	7.82667	6.82667	2.33	2.44	29.77	35.7422	7	11.6667	12	18	29	12	19.82	7.42	7.42	106.333	116	58.4444	70.5556	6.11111	6.33333	10.625	148.44	147.773	7.75778	7.22444	2.31933	2.33667	29.9202	32.4003	6.66667	11.7778	11.5556	18	68	37.2222	45.9778	28	12.3333
1	10P	10GB	125	134	63.3333	69.6667	7	6	157.66	157.06	7.78	6.78	2.87	2.97	36.8895	43.8053	11	11.3333	14.3333	17.3333	33	18.31	18.31	8	7.31
2	10P	10GB	128	135	66	73	6	7	158.66	159.2	7.62	8.62	2.88	2.68	37.7953	31.0905	10	12.3333	14.6667	18.6667	24	18.56	18.56	8	8.35
3	10P	10GB	126.667	134.333	64	69	5.66667	6	155.33	158.33	8.02667	8.82667	2.98	2.798	37.1262	31.6994	11.6667	11.6667	14	18	25.21	19.82	19.82	7	7.42	126.556	134.444	64.4444	70.5556	6.22222	6.33333	11.7361	157.217	158.197	7.80889	8.07556	2.91	2.816	37.2703	35.5317	10.8889	11.7778	14.3333	18	77.3333	42.7	45.9778	27.4033	18.8967
1	10P	20GB	142	145	68.6667	70	7.33333	7.33333	174	177	8.66	8.61667	3.01	3.21	34.7575	37.2534	12.3333	10.3333	16	16	33	17	19.82	9	7.85
2	10P	20GB	148	153	66.6667	66	8	7	177	170	8.75	9.75333	3.03	3.85	34.6286	39.4737	12.6667	10.6667	14.3333	14.3333	34	15	20.21	9	7.89
3	10P	20GB	141.333	153	69.3333	68.5	8	9	167	166	8.66	8.00667	3.05	3.09	35.2194	38.5928	11.6667	11.6667	17.3333	17.3333	30	16	20.24	9	7.9	143.778	150.333	68.2222	68.1667	7.77778	7.77778	15.0556	172.667	171	8.69	8.79222	3.03	3.38333	34.8685	38.44	12.2222	10.8889	15.8889	15.8889	87.2222	51.0444	48.15	32.3333	16
1	10P	30GB	153.667	166	71	79	6.66667	8.33333	149	150	9.21	9.21	3.19	3.09	34.6363	33.5505	14	11	18	17	36	19.82	19.82	10	7.99
2	10P	30GB	158	169	77	77	7	7	141.33	144.33	9.05	9.35	3.47	3.47	38.3425	37.1123	14	8.66667	17	17	33	19.87	19.87	12	7.79
3	10P	30GB	152.667	167.333	73.6667	76.5	7.33333	8	147.33	137.33	8.92	9.14667	3.37	3.37	37.7803	36.844	14.3333	11.3333	18	17.3333	39	18.99	18.99	9	7.83	154.778	167.444	73.8889	77.5	7	7.77778	11.4411	145.887	143.887	9.06	9.23556	3.34333	3.31	36.9197	35.8356	14.1111	10.3333	17.6667	17.1111	96.1111	52.0444	50.7556	36	19.56
1	20P	ck	108	139	63.3333	69	7	7	150.66	147.66	7.78	6.88	2.47	2.33	31.7481	33.8663	7	8	10.3333	12	25	14	14	8	8
2	20P	ck	105	133	77.3333	69	6	8	145.66	149	6.82	6.32	3.08	2.15	45.1613	34.019	8	8.6	10.6667	13	26	13	12	8.35	7
3	20P	ck	108	132	73.3333	77	7	7	147.66	146.66	6.78	6.78	2.47	2.89	36.4307	42.6254	7	9	10.3333	14	25	14	15	8.31	9	107	134.667	71.3333	71.6667	6.66667	7.33333	8.25	147.993	147.773	7.12667	6.66	2.67333	2.45667	37.78	36.8369	7.33333	8.53333	10.4444	13	68.6667	44.1778	43	25.3333	13.6667
1	20P	10GB	146	143	70	72.6667	8.33333	8.66667	181.66	186.66	8.9	8.12	3.12	3.082	35.0562	37.9557	10	9.33333	18	15.3333	40	18.35	18.35	9.36	9
2	20P	10GB	146.333	145.333	73	75	6.66667	8	183	185.33	9.93	8.06	3.271	3.171	32.9406	39.3424	11	10	20	16	43	19.21	19.21	9.33	9.97
3	20P	10GB	142.667	142	73.6667	78	7	11.3333	185.4	184	9.56	9.45	3.54	3.16	37.0293	33.4392	12	9	17.6667	17.6667	44	20.34	20.34	9.52	8.3	145	143.444	72.2222	75.2222	7.33333	9.33333	16.2889	183.353	185.33	9.46333	8.54333	3.31033	3.13767	35.0087	36.9124	11	9.44444	18.5556	16.3333	87	51.6778	48.2667	42.3333	19.3
1	20P	20GB	167	175	85	85	8.33333	6.5	192	199	9	9.94	3.33	4.09	37	41.1469	10	11.3333	20	17.6667	40	20.33	20.33	10	11
2	20P	20GB	165	176	88	95	10	7.33333	195	195	9.08	9.66	4.08	3.78	44.9339	39.1304	13	11	20	17.3333	45	22	18.93	11	9.55
3	20P	20GB	164	173.333	87	89	11	7.66667	193.667	192	9.5	9.04	4.86	3.77	51.1579	41.7035	12	9	19	15.6667	49	20	19.26	11	10	165.333	174.778	86.6667	89.6667	9.77778	7.16667	6.48	193.556	195.333	9.19333	9.54667	4.09	3.88	44.3639	40.6603	11.6667	10.4444	19.6667	16.8889	79.8889	54.6667	47.5944	44.6667	20.7767
1	20P	30GB	176.667	187.333	99	99	12	6.66667	256.333	255.3	9.3	9.98	4.02	4.13	43.2258	41.3828	11	10.6667	25	16.6667	45	23	18.96	11	11
2	20P	30GB	170.667	181	95	99	12	8.66667	255	253	10.5	11	4.11	4.22	39.1429	38.3636	13	12	23	18	55	22	18.89	11.32	9.32
3	20P	30GB	174.667	189.667	99	96	14	8.5	255.66	259.66	10.95	10.12	4.49	4	41.0046	39.5257	12	10.3333	22	16	50	23	19.09	10.89	8.82	174	186	97.6667	98	12.6667	7.94444	11.3333	255.664	255.987	10.25	10.3667	4.20667	4.11667	41.1244	39.7574	12	11	23.3333	16.8889	96.5556	59.4333	48.1389	50	22.6667
1	30P	ck	108	133	83.3333	89	7	7	147.66	149.66	9.85	8.78	3.22	3.8	32.6904	43.2802	7	9	10.3333	9.6	25	14	14	8.6	8.4
2	30P	ck	105	139	77.3333	88	6	8	148.66	145.66	9.14	9.02	3	3.67	32.8228	40.6874	6	8	10.6667	11	26	13	13	8.4	8.66
3	30P	ck	107	135	89	89	5.66667	8	148.33	146.33	9.05	8.85	3.98	4.3	43.9779	48.5876	7	9	12	10	29	12	15	8.2	9	106.667	135.667	83.2222	88.6667	6.22222	7.66667	8.29167	148.217	147.217	9.34667	8.88333	3.4	3.92333	36.497	44.185	6.66667	8.66667	11	10.2	68.3333	37.4444	44.3333	26.6667	13
1	30P	10GB	163.333	157.333	95	99	9	8	214.333	214.333	11	12	5.2	5.66	47.2727	47.1667	12	9	20	15.3333	50	20.19	20.19	10	9.33
2	30P	10GB	165	165.667	99	93	8.33333	10.5	217.333	207.333	11.3	11.3	5.27	5.56	46.6372	49.2035	13	11.3333	22	17.3333	59	19	20.23	10	9.48
3	30P	10GB	165	163.667	100	95	8.66667	9.33333	213.333	213.333	11.33	11.95	5.26	5.68	46.4254	47.5314	14	11.3333	22	17.3333	55	18.95	18.95	9	9.32	164.444	162.222	98	95.6667	8.66667	9.27778	9.5	215	211.667	11.21	11.75	5.24333	5.63333	46.7784	47.9672	13	10.5556	21.3333	16.6667	95	54.6333	48.2278	54.6667	19.38
1	30P	20GB	194.333	184.667	99	95	9.66667	11	255.333	255.333	10.03	12.54	5.85	5.46	58.325	43.5407	15	10.6667	24	17.3333	60	25	18.45	12	10
2	30P	20GB	192.333	180.333	105	98	10	10.6667	255.333	249	12.07	13.22	6.66	6.33	55.1781	47.882	14	9.66667	25	15.3333	66	24	20.17	11	11
3	30P	20GB	193.667	173.667	105	105	9	10.6667	255.333	250.333	13	12.36	6	5.88	46.1538	47.5728	16	8	24	14.3333	59	22	18.36	10	12	193.444	179.556	103	99.3333	9.55556	10.7778	14.6111	255.333	251.556	11.7	12.7067	6.17	5.89	53.219	46.3318	15	9.44444	24.3333	15.6667	98	59.0222	46.7722	61.6667	23.6667
1	30P	30GB	185.667	186.667	110	112	15	15.6667	265	262.5	13.22	13.6	6.64	6.74	50.2269	49.5588	18	11.3333	27	17.3333	77	26	19.06	12	12
2	30P	30GB	183.333	185	112	111	16	16.5	259	269	13.25	12.95	5.68	6.59	42.8679	50.888	17	10.6667	30	7.66667	67	21.74	19.74	12	12
3	30P	30GB	183.333	188	114	114	15	16.6667	268	260.667	13.55	14.23	5.79	6.6	42.7306	46.3809	16	9.66667	29	16	66	25	19.85	13	12	184.111	186.556	112	112.333	15.3333	16.2778	14.4167	264	264.056	13.34	13.5933	6.03667	6.64333	45.2752	48.9426	17	10.5556	28.6667	13.6667	102.333	55	56.3333	70	24.2467
[truncated: 3 more columns]

## Sheet: Sheet2
rep	a	b	dryweight	PH	TILNUM	leafarea	NSM	BY	GW	HARVEST INDEX	nospikletsspike	spike length	nograinspike	Chloro	1000 g.w	Amylose	protien	leafarea	nograinspike	Chloro	Chloro
rep	a	b	DW	PH	TN	LA	NSM	BY	GY	HI	NSS	SL	NGS	Chloro	TKW	AMY	PC	LA	NGS	Chloro	Chloro
1	CK	ck	108	53.3333	7	9.375	137.66	5.78	1.847	31.955	6	10.3333	70	37	25	14	6.31	9.375	70	37	36
2	CK	ck	105	57.3333	6	10.375	138.66	5.62	1.848	32.8826	6	10.6667	66	35	26	13	7.35	10.375	66	35	35
3	CK	ck	107	59	5.66667	10.75	138.33	5.82	1.98	34.0206	7	12	69	38.3333	29	12	6.42	10.75	69	38.3333	38
1	CK	10GB	111	83.3333	7	9.375	147.66	9.85	3.22	32.6904	7	10.3333	70	39	25	14	8.6	9.375	70	39	40
2	CK	10GB	112	77.3333	6	7.5	148.66	9.14	3	32.8228	6	10.6667	66	35	26	13	8.4	7.5	66	35	44
3	CK	10GB	114	89	5.66667	8	148.33	9.05	3.98	43.9779	7	12	69	38.3333	29	12	8.2	8	69	38.3333	49
1	CK	20GB	128	68.6667	7.33333	14.3333	174	8.66	3.01	34.7575	12.3333	16	90	54.4	33	17	9	14.3333	90	54.4	48.8333
2	CK	20GB	125	66.6667	8	15.3333	177	8.75	3.03	34.6286	12.6667	14.3333	83.6667	49.2333	34	15	9	15.3333	83.6667	49.2333	48.4667
3	CK	20GB	130	69.3333	8	15.5	167	8.66	3.05	35.2194	11.6667	17.3333	88	49.5	30	16	9	15.5	88	49.5	47.15
1	CK	30GB	134	70	8.33333	16	181.66	8.9	3.12	35.0562	10	18	88	51.4	40	18.35	9.36	16	88	51.4	51.2
2	CK	30GB	138	73	6.66667	16.2	183	9.93	3.271	32.9406	11	20	86	50.3667	43	19.21	9.33	16.2	86	50.3667	46
3	CK	30GB	136	73.6667	7	16.6667	185.4	9.56	3.54	37.0293	12	17.6667	87	53.2667	44	20.34	9.52	16.6667	87	53.2667	47.6
1	10P	ck	105	57.3333	6	10.375	148.66	7.62	2.48	32.5459	6	10.6667	66	35	26	13	7.35	10.375	66	35	47.0333
2	10P	ck	107	59	6.66667	10.75	148.33	7.82667	2.148	27.4446	7	12	69	38.3333	29	12	6.2	10.75	69	38.3333	48
3	10P	ck	107	59	5.66667	10.75	148.33	7.82667	2.33	29.77	7	12	69	38.3333	29	12	7.42	10.75	69	38.3333	42.9
1	10P	10GB	125	63.3333	7	11.5417	157.66	7.78	2.87	36.8895	11	14.3333	80	42.7667	33	18.31	8	11.5417	80	42.7667	47.0333
2	10P	10GB	128	66	6	10.3333	158.66	7.62	2.88	37.7953	10	14.6667	75	44	24	18.56	8	10.3333	75	44	48
3	10P	10GB	126.667	64	5.66667	13.3333	155.33	8.02667	2.98	37.1262	11.6667	14	77	41.3333	25.21	19.82	7	13.3333	77	41.3333	42.9
1	10P	20GB	142	68.6667	7.33333	14.3333	174	8.66	3.01	34.7575	12.3333	16	90	54.4	33	17	9	14.3333	90	54.4	48.8333
2	10P	20GB	148	66.6667	8	15.3333	177	8.75	3.03	34.6286	12.6667	14.3333	83.6667	49.2333	34	15	9	15.3333	83.6667	49.2333	48.4667
3	10P	20GB	141.333	69.3333	8	15.5	167	8.66	3.05	35.2194	11.6667	17.3333	88	49.5	30	16	9	15.5	88	49.5	47.15
1	10P	30GB	153.667	71	6.66667	8	149	9.21	3.19	34.6363	14	18	97.3333	48.6667	36	19.82	10	8	97.3333	48.6667	50
2	10P	30GB	158	77	7	6.99	141.33	9.05	3.47	38.3425	14	17	95	56.1667	33	19.87	12	6.99	95	56.1667	53.1667
3	10P	30GB	152.667	73.6667	7.33333	19.3333	147.33	8.92	3.37	37.7803	14.3333	18	96	51.3	39	18.99	9	19.3333	96	51.3	49.1
1	20P	ck	108	63.3333	7	9.375	150.66	7.78	2.47	31.7481	7	10.3333	70	43.7667	25	14	8	9.375	70	43.7667	42
2	20P	ck	105	77.3333	6	6	145.66	6.82	3.08	45.1613	8	10.6667	66	45	26	13	8.35	6	66	45	43
3	20P	ck	108	73.3333	7	9.375	147.66	6.78	2.47	36.4307	7	10.3333	70	43.7667	25	14	8.31	9.375	70	43.7667	44
1	20P	10GB	146	70	8.33333	16	181.66	8.9	3.12	35.0562	10	18	88	51.4	40	18.35	9.36	16	88	51.4	51.2
2	20P	10GB	146.333	73	6.66667	16.2	183	9.93	3.271	32.9406	11	20	86	50.3667	43	19.21	9.33	16.2	86	50.3667	46
3	20P	10GB	142.667	73.6667	7	16.6667	185.4	9.56	3.54	37.0293	12	17.6667	87	53.2667	44	20.34	9.52	16.6667	87	53.2667	47.6
1	20P	20GB	167	85	8.33333	6.58	192	9	3.33	37	10	20	81.3333	55	40	20.33	10	6.58	81.3333	55	44.75
2	20P	20GB	165	88	10	6.86	195	9.08	4.08	44.9339	13	20	78.3333	59	45	22	11	6.86	78.3333	59	48.7333
3	20P	20GB	164	87	11	6	193.667	9.5	4.86	51.1579	12	19	80	50	49	20	11	6	80	50	49.3
1	20P	30GB	176.667	99	12	11	256.333	9.3	4.02	43.2258	11	25	99	56.7	45	23	11	11	99	56.7	50.6
2	20P	30GB	170.667	95	12	11	255	10.5	4.11	39.1429	13	23	95.6667	59.0333	55	22	11.32	11	95.6667	59.0333	49.8667
3	20P	30GB	174.667	99	14	12	255.66	10.95	4.49	41.0046	12	22	95	62.5667	50	23	10.89	12	95	62.5667	43.95
1	30P	ck	108	83.3333	7	9.375	147.66	9.85	3.22	32.6904	7	10.3333	70	39	25	14	8.6	9.375	70	39	40
2	30P	ck	105	77.3333	6	7.5	148.66	9.14	3	32.8228	6	10.6667	66	35	26	13	8.4	7.5	66	35	44
3	30P	ck	107	89	5.66667	8	148.33	9.05	3.98	43.9779	7	12	69	38.3333	29	12	8.2	8	69	38.3333	49
1	30P	10GB	163.333	95	9	9	214.333	11	5.2	47.2727	12	20	95	53	50	20.19	10	9	95	53	49.3
2	30P	10GB	165	99	8.33333	10	217.333	11.3	5.27	46.6372	13	22	96	55.9	59	19	10	10	96	55.9	49.35
3	30P	10GB	165	100	8.66667	9.5	213.333	11.33	5.26	46.4254	14	22	94	55	55	18.95	9	9.5	94	55	46.0333
1	30P	20GB	194.333	99	9.66667	17.7083	255.333	10.03	5.85	58.325	15	24	97	57.4667	60	25	12	17.7083	97	57.4667	45.95
2	30P	20GB	192.333	105	10	12.375	255.333	12.07	6.66	55.1781	14	25	99	59.9667	66	24	11	12.375	99	59.9667	47.3667
3	30P	20GB	193.667	105	9	13.75	255.333	13	6	46.1538	16	24	98	59.6333	59	22	10	13.75	98	59.6333	47
1	30P	30GB	185.667	110	15	15.75	265	13.22	6.64	50.2269	18	27	105	55	77	26	12	15.75	105	55	55
2	30P	30GB	183.333	112	16	14.25	259	13.25	5.68	42.8679	17	30	100	54	67	21.74	12	14.25	100	54	59
3	30P	30GB	183.333	114	15	13.25	268	13.55	5.79	42.7306	16	29	102	56	66	25	13	13.25	102	56	55
							ck	ck	ck	10GB	10GB	10GB	20GB	20GB	20GB	30GB	30GB	30GB
						ck	108	105	107	111	112	114	128	125	130	134	138	136
						10p	105	107	107	125	128	126.667	142	148	141.333	153.667	158	152.667
						20p	108	105	108	146	146.333	142.667	167	165	164	176.667	170.667	174.667
						30GB	108	105	107	163.333	165	165	194.333	192.333	193.667	185.667	183.333	183.333

## Sheet: Sheet3
rep	a	b	dryweight		PH	PH	TILNUM	TIL NUM	leafarea	NSM		BY	BY	GW	GW	HARVEST INDEX	HARVEST INDEX	nospikletsspike	NTS	spike length	SL	nograinspike	Chloro	Chloro	1000 g.w	Amylose	x9	protien	x10
rep	a	b	DW	DW	PH	PH	TN	TN	LA	NSM	NSM	BY	BY	GY	GY	HI	HI	NSS	NSS	SL	SL	NGS	Chloro	Chloro	TKW	AMY	AMY	PC	PC	DW	DW	PH	PH	TN	TN	LA	NSM	NSM	BY	BY	GY	GY	HI	HI	NSS	NSS	SL	SL	NGS
1	CK	ck	108	104	53.3333	55	7	7	9.375	137.66	134	5.78	5.78	1.847	1.7367	31.955	30.0467	6	6	10.3333	11	70	37	36	25	14	13	6.31	6
2	CK	ck	105	105	57.3333	62	6	4	10.375	138.66	138	5.62	4.62	1.848	1.98	32.8826	42.8571	6	7	10.6667	12	66	35	35	26	13	12	7.35	6.4
3	CK	ck	107	106	59	53	5.66667	3	10.75	138.33	135	5.82	5.82667	1.98	1.848	34.0206	31.7162	7	6.6	12	11	69	38.3333	38	29	12	11	6.42	6.9	106.667	105	56.5556	56.6667	6.22222	4.66667	10.1667	138.217	135.667	5.74	5.40889	1.89167	1.8549	32.9527	34.8734	6.33333	6.53333	11	11.3333	68.3333
1	CK	10GB	111	115	83.3333	89	7	7	9.375	147.66	149.66	9.85	8.78	3.22	3.8	32.6904	43.2802	7	9	10.3333	9.6	70	39	40	25	14	14	8.6	8.4
2	CK	10GB	112	112	77.3333	88	6	8	7.5	148.66	145.66	9.14	9.02	3	3.67	32.8228	40.6874	6	8	10.6667	11	66	35	44	26	13	13	8.4	8.66
3	CK	10GB	114	117	89	89	5.66667	8	8	148.33	146.33	9.05	8.85	3.98	4.3	43.9779	48.5876	7	9	12	10	69	38.3333	49	29	12	15	8.2	9	112.333	114.667	83.2222	88.6667	6.22222	7.66667	8.29167	148.217	147.217	9.34667	8.88333	3.4	3.92333	36.497	44.185	6.66667	8.66667	11	10.2	68.3333
1	CK	20GB	128	128	68.6667	70	7.33333	7.33333	14.3333	174	177	8.66	8.61667	3.01	3.21	34.7575	37.2534	12.3333	10.3333	16	16	90	54.4	48.8333	33	17	19.82	9	7.85
2	CK	20GB	125	129	66.6667	66	8	7	15.3333	177	170	8.75	9.75333	3.03	3.85	34.6286	39.4737	12.6667	10.6667	14.3333	14.3333	83.6667	49.2333	48.4667	34	15	20.21	9	7.89
3	CK	20GB	130	135	69.3333	68.5	8	9	15.5	167	166	8.66	8.00667	3.05	3.09	35.2194	38.5928	11.6667	11.6667	17.3333	17.3333	88	49.5	47.15	30	16	20.24	9	7.9	127.667	130.667	68.2222	68.1667	7.77778	7.77778	15.0556	172.667	171	8.69	8.79222	3.03	3.38333	34.8685	38.44	12.2222	10.8889	15.8889	15.8889	87.2222
1	CK	30GB	134	139	70	72.6667	8.33333	8.66667	16	181.66	186.66	8.9	8.12	3.12	3.082	35.0562	37.9557	10	9.33333	18	15.3333	88	51.4	51.2	40	18.35	18.35	9.36	9
2	CK	30GB	138	136	73	75	6.66667	8	16.2	183	185.33	9.93	8.06	3.271	3.171	32.9406	39.3424	11	10	20	16	86	50.3667	46	43	19.21	19.21	9.33	9.97
3	CK	30GB	136	142	73.6667	78	7	11.3333	16.6667	185.4	184	9.56	9.45	3.54	3.16	37.0293	33.4392	12	9	17.6667	17.6667	87	53.2667	47.6	44	20.34	20.34	9.52	8.3	136	139	72.2222	75.2222	7.33333	9.33333	16.2889	183.353	185.33	9.46333	8.54333	3.31033	3.13767	35.0087	36.9124	11	9.44444	18.5556	16.3333	87
1	10P	ck	105	109	57.3333	69.6667	6	6	10.375	148.66	147.66	7.62	7.02	2.48	2.09	32.5459	29.7721	6	11.3333	10.6667	17.3333	66	35	47.0333	26	13	18.31	7.35	6.31
2	10P	ck	107	119	59	73	6.66667	7	10.75	148.33	147.33	7.82667	7.82667	2.148	2.48	27.4446	31.6865	7	12.3333	12	18.6667	69	38.3333	48	29	12	18.56	6.2	7.35
3	10P	ck	107	120	59	69	5.66667	6	10.75	148.33	148.33	7.82667	6.82667	2.33	2.44	29.77	35.7422	7	11.6667	12	18	69	38.3333	42.9	29	12	19.82	7.42	7.42	106.333	116	58.4444	70.5556	6.11111	6.33333	10.625	148.44	147.773	7.75778	7.22444	2.31933	2.33667	29.9202	32.4003	6.66667	11.7778	11.5556	18	68
1	10P	10GB	125	134	63.3333	69.6667	7	6	11.5417	157.66	157.06	7.78	6.78	2.87	2.97	36.8895	43.8053	11	11.3333	14.3333	17.3333	80	42.7667	47.0333	33	18.31	18.31	8	7.31
2	10P	10GB	128	135	66	73	6	7	10.3333	158.66	159.2	7.62	8.62	2.88	2.68	37.7953	31.0905	10	12.3333	14.6667	18.6667	75	44	48	24	18.56	18.56	8	8.35
3	10P	10GB	126.667	134.333	64	69	5.66667	6	13.3333	155.33	158.33	8.02667	8.82667	2.98	2.798	37.1262	31.6994	11.6667	11.6667	14	18	77	41.3333	42.9	25.21	19.82	19.82	7	7.42	126.556	134.444	64.4444	70.5556	6.22222	6.33333	11.7361	157.217	158.197	7.80889	8.07556	2.91	2.816	37.2703	35.5317	10.8889	11.7778	14.3333	18	77.3333
1	10P	20GB	142	145	68.6667	70	7.33333	7.33333	14.3333	174	177	8.66	8.61667	3.01	3.21	34.7575	37.2534	12.3333	10.3333	16	16	90	54.4	48.8333	33	17	19.82	9	7.85
2	10P	20GB	148	153	66.6667	66	8	7	15.3333	177	170	8.75	9.75333	3.03	3.85	34.6286	39.4737	12.6667	10.6667	14.3333	14.3333	83.6667	49.2333	48.4667	34	15	20.21	9	7.89
3	10P	20GB	141.333	153	69.3333	68.5	8	9	15.5	167	166	8.66	8.00667	3.05	3.09	35.2194	38.5928	11.6667	11.6667	17.3333	17.3333	88	49.5	47.15	30	16	20.24	9	7.9	143.778	150.333	68.2222	68.1667	7.77778	7.77778	15.0556	172.667	171	8.69	8.79222	3.03	3.38333	34.8685	38.44	12.2222	10.8889	15.8889	15.8889	87.2222
1	10P	30GB	153.667	166	71	79	6.66667	8.33333	8	149	150	9.21	9.21	3.19	3.09	34.6363	33.5505	14	11	18	17	97.3333	48.6667	50	36	19.82	19.82	10	7.99
2	10P	30GB	158	169	77	77	7	7	6.99	141.33	144.33	9.05	9.35	3.47	3.47	38.3425	37.1123	14	8.66667	17	17	95	56.1667	53.1667	33	19.87	19.87	12	7.79
3	10P	30GB	152.667	167.333	73.6667	76.5	7.33333	8	19.3333	147.33	137.33	8.92	9.14667	3.37	3.37	37.7803	36.844	14.3333	11.3333	18	17.3333	96	51.3	49.1	39	18.99	18.99	9	7.83	154.778	167.444	73.8889	77.5	7	7.77778	11.4411	145.887	143.887	9.06	9.23556	3.34333	3.31	36.9197	35.8356	14.1111	10.3333	17.6667	17.1111	96.1111
1	20P	ck	108	139	63.3333	69	7	7	9.375	150.66	147.66	7.78	6.88	2.47	2.33	31.7481	33.8663	7	8	10.3333	12	70	43.7667	42	25	14	14	8	8
2	20P	ck	105	133	77.3333	69	6	8	6	145.66	149	6.82	6.32	3.08	2.15	45.1613	34.019	8	8.6	10.6667	13	66	45	43	26	13	12	8.35	7
3	20P	ck	108	132	73.3333	77	7	7	9.375	147.66	146.66	6.78	6.78	2.47	2.89	36.4307	42.6254	7	9	10.3333	14	70	43.7667	44	25	14	15	8.31	9	107	134.667	71.3333	71.6667	6.66667	7.33333	8.25	147.993	147.773	7.12667	6.66	2.67333	2.45667	37.78	36.8369	7.33333	8.53333	10.4444	13	68.6667
1	20P	10GB	146	143	70	72.6667	8.33333	8.66667	16	181.66	186.66	8.9	8.12	3.12	3.082	35.0562	37.9557	10	9.33333	18	15.3333	88	51.4	51.2	40	18.35	18.35	9.36	9
2	20P	10GB	146.333	145.333	73	75	6.66667	8	16.2	183	185.33	9.93	8.06	3.271	3.171	32.9406	39.3424	11	10	20	16	86	50.3667	46	43	19.21	19.21	9.33	9.97
3	20P	10GB	142.667	142	73.6667	78	7	11.3333	16.6667	185.4	184	9.56	9.45	3.54	3.16	37.0293	33.4392	12	9	17.6667	17.6667	87	53.2667	47.6	44	20.34	20.34	9.52	8.3	145	143.444	72.2222	75.2222	7.33333	9.33333	16.2889	183.353	185.33	9.46333	8.54333	3.31033	3.13767	35.0087	36.9124	11	9.44444	18.5556	16.3333	87
1	20P	20GB	167	175	85	85	8.33333	6.5	6.58	192	199	9	9.94	3.33	4.09	37	41.1469	10	11.3333	20	17.6667	81.3333	55	44.75	40	20.33	20.33	10	11
2	20P	20GB	165	176	88	95	10	7.33333	6.86	195	195	9.08	9.66	4.08	3.78	44.9339	39.1304	13	11	20	17.3333	78.3333	59	48.7333	45	22	18.93	11	9.55
3	20P	20GB	164	173.333	87	89	11	7.66667	6	193.667	192	9.5	9.04	4.86	3.77	51.1579	41.7035	12	9	19	15.6667	80	50	49.3	49	20	19.26	11	10	165.333	174.778	86.6667	89.6667	9.77778	7.16667	6.48	193.556	195.333	9.19333	9.54667	4.09	3.88	44.3639	40.6603	11.6667	10.4444	19.6667	16.8889	79.8889
1	20P	30GB	176.667	187.333	99	99	12	6.66667	11	256.333	255.3	9.3	9.98	4.02	4.13	43.2258	41.3828	11	10.6667	25	16.6667	99	56.7	50.6	45	23	18.96	11	11
2	20P	30GB	170.667	181	95	99	12	8.66667	11	255	253	10.5	11	4.11	4.22	39.1429	38.3636	13	12	23	18	95.6667	59.0333	49.8667	55	22	18.89	11.32	9.32
3	20P	30GB	174.667	189.667	99	96	14	8.5	12	255.66	259.66	10.95	10.12	4.49	4	41.0046	39.5257	12	10.3333	22	16	95	62.5667	43.95	50	23	19.09	10.89	8.82	174	186	97.6667	98	12.6667	7.94444	11.3333	255.664	255.987	10.25	10.3667	4.20667	4.11667	41.1244	39.7574	12	11	23.3333	16.8889	96.5556
1	30P	ck	108	133	83.3333	89	7	7	9.375	147.66	149.66	9.85	8.78	3.22	3.8	32.6904	43.2802	7	9	10.3333	9.6	70	39	40	25	14	14	8.6	8.4
2	30P	ck	105	139	77.3333	88	6	8	7.5	148.66	145.66	9.14	9.02	3	3.67	32.8228	40.6874	6	8	10.6667	11	66	35	44	26	13	13	8.4	8.66
3	30P	ck	107	135	89	89	5.66667	8	8	148.33	146.33	9.05	8.85	3.98	4.3	43.9779	48.5876	7	9	12	10	69	38.3333	49	29	12	15	8.2	9	106.667	135.667	83.2222	88.6667	6.22222	7.66667	8.29167	148.217	147.217	9.34667	8.88333	3.4	3.92333	36.497	44.185	6.66667	8.66667	11	10.2	68.3333
1	30P	10GB	163.333	157.333	95	99	9	8	9	214.333	214.333	11	12	5.2	5.66	47.2727	47.1667	12	9	20	15.3333	95	53	49.3	50	20.19	20.19	10	9.33
2	30P	10GB	165	165.667	99	93	8.33333	10.5	10	217.333	207.333	11.3	11.3	5.27	5.56	46.6372	49.2035	13	11.3333	22	17.3333	96	55.9	49.35	59	19	20.23	10	9.48
3	30P	10GB	165	163.667	100	95	8.66667	9.33333	9.5	213.333	213.333	11.33	11.95	5.26	5.68	46.4254	47.5314	14	11.3333	22	17.3333	94	55	46.0333	55	18.95	18.95	9	9.32	164.444	162.222	98	95.6667	8.66667	9.27778	9.5	215	211.667	11.21	11.75	5.24333	5.63333	46.7784	47.9672	13	10.5556	21.3333	16.6667	95
1	30P	20GB	194.333	184.667	99	95	9.66667	11	17.7083	255.333	255.333	10.03	12.54	5.85	5.46	58.325	43.5407	15	10.6667	24	17.3333	97	57.4667	45.95	60	25	18.45	12	10
2	30P	20GB	192.333	180.333	105	98	10	10.6667	12.375	255.333	249	12.07	13.22	6.66	6.33	55.1781	47.882	14	9.66667	25	15.3333	99	59.9667	47.3667	66	24	20.17	11	11
3	30P	20GB	193.667	173.667	105	105	9	10.6667	13.75	255.333	250.333	13	12.36	6	5.88	46.1538	47.5728	16	8	24	14.3333	98	59.6333	47	59	22	18.36	10	12	193.444	179.556	103	99.3333	9.55556	10.7778	14.6111	255.333	251.556	11.7	12.7067	6.17	5.89	53.219	46.3318	15	9.44444	24.3333	15.6667	98
1	30P	30GB	185.667	186.667	110	112	15	15.6667	15.75	265	262.5	13.22	13.6	6.64	6.74	50.2269	49.5588	18	11.3333	27	17.3333	105	55	55	77	26	19.06	12	12
2	30P	30GB	183.333	185	112	111	16	16.5	14.25	259	269	13.25	12.95	5.68	6.59	42.8679	50.888	17	10.6667	30	7.66667	100	54	59	67	21.74	19.74	12	12
3	30P	30GB	183.333	188	114	114	15	16.6667	13.25	268	260.667	13.55	14.23	5.79	6.6	42.7306	46.3809	16	9.66667	29	16	102	56	55	66	25	19.85	13	12	184.111	186.556	112	112.333	15.3333	16.2778	14.4167	264	264.056	13.34	13.5933	6.03667	6.64333	45.2752	48.9426	17	10.5556	28.6667	13.6667	102.333
[truncated: 7 more columns]

## Sheet: Sheet4
a	b	DW	DW	PH	PH	TN	TN	NSM	NSM	BY	BY	GY	GY	HI	HI	NSS	NSS	SL	SL	NGS	Chloro	Chloro	TKW	AMY	AMY	PC	PC
CK	ck	106.667	105	56.5556	56.6667	6.22222	4.66667	138.217	135.667	5.74	5.40889	1.89167	1.8549	32.9527	34.8734	6.33333	6.53333	11	11.3333	68.3333	36.7778	36.3333	26.6667	13	12	6.69333	6.43333
CK	10GB	112.333	114.667	83.2222	88.6667	6.22222	7.66667	148.217	147.217	9.34667	8.88333	3.4	3.92333	36.497	44.185	6.66667	8.66667	11	10.2	68.3333	37.4444	44.3333	26.6667	13	14	8.4	8.68667
CK	20GB	127.667	130.667	68.2222	68.1667	7.77778	7.77778	172.667	171	8.69	8.79222	3.03	3.38333	34.8685	38.44	12.2222	10.8889	15.8889	15.8889	87.2222	51.0444	48.15	32.3333	16	20.09	9	7.88
CK	30GB	136	139	72.2222	75.2222	7.33333	9.33333	183.353	185.33	9.46333	8.54333	3.31033	3.13767	35.0087	36.9124	11	9.44444	18.5556	16.3333	87	51.6778	48.2667	42.3333	19.3	19.3	9.40333	9.09
10P	ck	106.333	116	58.4444	70.5556	6.11111	6.33333	148.44	147.773	7.75778	7.22444	2.31933	2.33667	29.9202	32.4003	6.66667	11.7778	11.5556	18	68	37.2222	45.9778	28	12.3333	18.8967	6.99	7.02667
10P	10GB	126.556	134.444	64.4444	70.5556	6.22222	6.33333	157.217	158.197	7.80889	8.07556	2.91	2.816	37.2703	35.5317	10.8889	11.7778	14.3333	18	77.3333	42.7	45.9778	27.4033	18.8967	18.8967	7.66667	7.69333
10P	20GB	143.778	150.333	68.2222	68.1667	7.77778	7.77778	172.667	171	8.69	8.79222	3.03	3.38333	34.8685	38.44	12.2222	10.8889	15.8889	15.8889	87.2222	51.0444	48.15	32.3333	16	20.09	9	7.88
10P	30GB	154.778	167.444	73.8889	77.5	7	7.77778	145.887	143.887	9.06	9.23556	3.34333	3.31	36.9197	35.8356	14.1111	10.3333	17.6667	17.1111	96.1111	52.0444	50.7556	36	19.56	19.56	10.3333	7.87
20P	ck	107	134.667	71.3333	71.6667	6.66667	7.33333	147.993	147.773	7.12667	6.66	2.67333	2.45667	37.78	36.8369	7.33333	8.53333	10.4444	13	68.6667	44.1778	43	25.3333	13.6667	13.6667	8.22	8
20P	10GB	145	143.444	72.2222	75.2222	7.33333	9.33333	183.353	185.33	9.46333	8.54333	3.31033	3.13767	35.0087	36.9124	11	9.44444	18.5556	16.3333	87	51.6778	48.2667	42.3333	19.3	19.3	9.40333	9.09
20P	20GB	165.333	174.778	86.6667	89.6667	9.77778	7.16667	193.556	195.333	9.19333	9.54667	4.09	3.88	44.3639	40.6603	11.6667	10.4444	19.6667	16.8889	79.8889	54.6667	47.5944	44.6667	20.7767	19.5067	10.6667	10.1833
20P	30GB	174	186	97.6667	98	12.6667	7.94444	255.664	255.987	10.25	10.3667	4.20667	4.11667	41.1244	39.7574	12	11	23.3333	16.8889	96.5556	59.4333	48.1389	50	22.6667	18.98	11.07	9.71333
30P	ck	106.667	135.667	83.2222	88.6667	6.22222	7.66667	148.217	147.217	9.34667	8.88333	3.4	3.92333	36.497	44.185	6.66667	8.66667	11	10.2	68.3333	37.4444	44.3333	26.6667	13	14	8.4	8.68667
30P	10GB	164.444	162.222	98	95.6667	8.66667	9.27778	215	211.667	11.21	11.75	5.24333	5.63333	46.7784	47.9672	13	10.5556	21.3333	16.6667	95	54.6333	48.2278	54.6667	19.38	19.79	9.66667	9.37667
30P	20GB	193.444	179.556	103	99.3333	9.55556	10.7778	255.333	251.556	11.7	12.7067	6.17	5.89	53.219	46.3318	15	9.44444	24.3333	15.6667	98	59.0222	46.7722	61.6667	23.6667	18.9933	11	11
30P	30GB	184.111	186.556	112	112.333	15.3333	16.2778	264	264.056	13.34	13.5933	6.03667	6.64333	45.2752	48.9426	17	10.5556	28.6667	13.6667	102.333	55	56.3333	70	24.2467	19.55	12.3333	12
a	b	DW	DW	PH	PH	TN	TN	NSM	NSM	BY	BY	GY	GY	HI	HI	NSS	NSS	SL	SL	NGS	Chloro	Chloro	TKW	AMY	AMY	PC	PC
CK	ck	100	100	100	100	100	100	100	100	100	100	100	100	100	100	100	100	100	100	100	100	100	100	100	100	100	100
CK	10GB	105.312	109.206	147.151	156.471	100	164.286	107.235	108.514	162.834	164.236	179.736	211.512	110.756	126.701	105.263	132.653	100	90	100	101.813	122.018	100	100	116.667	125.498	135.026
CK	20GB	119.688	124.444	120.629	120.294	125	166.667	124.925	126.044	92.9743	98.9744	160.176	182.4	105.814	110.227	192.982	166.667	144.444	140.196	127.642	138.792	132.523	121.25	123.077	167.417	134.462	122.487
CK	30GB	127.5	132.381	127.701	132.745	117.857	200	132.656	136.607	164.866	157.95	174.996	169.156	106.239	105.847	173.684	144.558	168.687	144.118	127.317	140.514	132.844	158.75	148.462	160.833	140.488	141.295
10P	ck	99.6875	110.476	103.34	124.51	98.2143	135.714	107.397	108.924	135.153	133.566	122.608	125.973	90.7973	92.9083	105.263	180.272	105.051	158.824	99.5122	101.208	126.544	105	94.8718	157.472	104.432	109.223
10P	10GB	118.646	128.042	113.949	124.51	100	135.714	113.747	116.607	136.043	149.302	153.833	151.814	113.102	101.888	171.93	180.272	130.303	158.824	113.171	116.103	126.544	102.763	145.359	157.472	114.542	119.585
10P	20GB	134.792	143.175	120.629	120.294	125	166.667	124.925	126.044	151.394	162.551	160.176	182.4	105.814	110.227	192.982	166.667	144.444	140.196	127.642	138.792	132.523	121.25	123.077	167.417	134.462	122.487
10P	30GB	145.104	159.471	130.648	136.765	112.5	166.667	105.549	106.059	157.84	170.748	176.74	178.446	112.038	102.759	222.807	158.163	160.606	150.98	140.65	141.511	139.694	135	150.462	163	154.382	122.332
20P	ck	100.312	128.254	126.13	126.471	107.143	157.143	107.073	108.924	124.158	123.131	141.322	132.442	114.649	105.63	115.789	130.612	94.9495	114.706	100.488	120.121	118.349	95	105.128	113.889	122.809	124.352
20P	10GB	135.938	136.614	127.701	132.745	117.857	200	132.656	136.607	164.866	157.95	174.996	169.156	106.239	105.847	173.684	144.558	168.687	144.118	127.317	140.514	132.844	158.75	148.462	160.833	140.488	141.295
20P	20GB	155	166.455	153.242	158.235	157.143	153.571	140.038	143.98	160.163	176.5	216.211	209.176	134.629	116.594	184.211	159.864	178.788	149.02	116.911	148.64	130.994	167.5	159.821	162.556	159.363	158.29
20P	30GB	163.125	177.143	172.692	172.941	203.571	170.238	184.974	188.688	178.571	191.66	222.379	221.935	124.798	114.005	189.474	168.367	212.121	149.02	141.301	161.601	132.492	187.5	174.359	158.167	165.388	150.984
30P	ck	100	129.206	147.151	156.471	100	164.286	107.235	108.514	162.834	164.236	179.736	211.512	110.756	126.701	105.263	132.653	100	90	100	101.813	122.018	100	100	116.667	125.498	135.026
30P	10GB	154.167	154.497	173.281	168.824	139.286	198.81	155.553	156.02	195.296	217.235	277.181	303.7	141.956	137.547	205.263	161.565	193.939	147.059	139.024	148.55	132.737	205	149.077	164.917	144.422	145.751
30P	20GB	181.354	171.005	182.122	175.294	153.571	230.952	184.734	185.422	203.833	234.922	326.167	317.537	161.501	132.857	236.842	144.558	221.212	138.235	143.415	160.483	128.731	231.25	182.051	158.278	164.343	170.984
30	30	172.604	177.672	198.035	198.235	246.429	348.81	191.004	194.636	142.725	153.021	319.119	358.15	137.394	140.344	268.421	161.565	260.606	120.588	149.756	149.547	155.046	262.5	186.513	162.917	184.263	186.528
GB	DW	DW	PH	PH	TN	TN	LA	NSM	NSM	BY	BY	GY	GY	HI	HI	NSS	NSS	SL	SL	NGS	Chloro	Chloro	TKW	AMY	AMY	PC	PC
CK	120.667	122.333	70.0556	72.1806	6.88889	7.36111	12.4507	160.613	159.803	8.31	7.90694	2.908	3.07481	34.8317	38.6027	9.05556	8.88333	14.1111	13.4389	77.7222	44.2361	44.2708	32	15.325	16.3475	8.37417	8.0225
10	132.861	142.056	66.25	71.6944	6.77778	7.05556	12.2144	156.053	155.214	8.32917	8.33194	2.90067	2.9615	34.7447	35.5519	10.9722	11.1944	14.8611	17.25	82.1667	45.7528	47.7153	30.9342	16.6975	19.3608	8.4975	7.6175
20	147.833	159.722	81.9722	83.6389	9.11111	7.94444	10.5881	195.142	196.106	9.00833	8.77917	3.57008	3.39775	39.5693	38.5417	10.5	9.85556	18	15.7778	83.0278	52.4889	46.75	40.5833	19.1025	17.8633	9.84	9.24667
30	162.167	166	99.0556	99	9.94444	11	11.7049	220.637	218.624	11.3992	11.7333	5.2125	5.5225	45.4424	46.8567	12.9167	9.80556	21.3333	14.05	90.9167	51.525	48.9167	53.25	20.0733	18.0833	10.35	10.2658
	DW	DW	PH	PH	TN	TN	LA	NSM	NSM	BY	BY	GY	GY	HI	HI	NSS	NSS	SL	SL	NGS	Chloro	Chloro	TKW	AMY	AMY	PC	PC
ck	100	100	100	100	100	100	100	100	100	100	100	100	100	100	100	100	100	100	100	100	100	100	100	100	100	100	100
10	110.106	116.122	94.5678	99.3265	98.3871	95.8491	98.1025	97.1604	97.1282	100.231	105.375	99.7478	96.3149	99.7501	92.0969	121.166	126.016	105.315	128.359	105.718	103.429	107.78	96.6693	108.956	118.433	101.473	94.9517
20	122.514	130.563	117.01	115.875	132.258	107.925	85.0399	121.498	122.717	108.404	111.031	122.768	110.503	113.601	99.8421	115.951	110.944	127.559	117.404	106.826	118.656	105.6	126.823	124.649	109.273	117.504	115.259
30	134.392	135.695	141.396	137.156	144.355	149.434	94.0097	137.372	136.808	137.174	148.393	179.247	179.605	130.463	121.382	142.638	110.381	151.181	104.547	116.976	116.477	110.494	166.406	130.984	110.618	123.594	127.963
Proline	DW	DW	PH	PH	TN	TN	LA	NSM	NSM	BY	BY	GY	GY	HI	HI	NSS	NSS	SL	SL	NGS	Chloro	Chloro	TKW	AMY	AMY	PC	PC
CK	106.778	125.111	70.3704	72.3333	6.37037	6.55556	#REF!	144.809	143.552	7.40444	6.98407	2.655	2.74497	35.7433	38.6318	6.77778	7.91111	10.8148	11.5111	68.4444	39.4667	41.2222	26.2222	13.2222	13.2222	7.77111	7.70667
10	134.444	137.111	81.8889	84.963	7.03704	7.75926	#REF!	173.478	172.36	9.45519	9.56963	3.85111	4.12422	40.1819	42.5613	10.1852	10.3333	15.5556	14.9556	80.2222	44.9259	46.1796	36.2456	17.0922	17.5622	8.57778	8.58556
20	154.963	153.519	79.8148	78.5556	8.37037	8.77778	#REF!	200.222	197.852	9.69333	10.097	4.07667	4.21889	40.9853	41.0706	13.1481	10.4074	18.7037	15.8148	90.8148	53.7037	47.6907	42.1111	18.5556	19.7244	9.66667	8.92
30	158.296	164.333	86.037	88.3519	9.88889	11.1296	#REF!	197.747	197.757	10.6211	10.4574	4.23011	4.36367	39.0678	40.5635	14.037	10.1111	21.6296	15.7037	95.1481	52.9074	51.7852	49.4444	21.0356	19.47	10.69	9.65333
Proline	DW	DW	PH	PH	TN	TN	LA	NSM	NSM	BY	BY	GY	GY	HI	HI	NSS	NSS	SL	SL	NGS	Chloro	Chloro	TKW	AMY	AMY	PC	PC
CK	100	100	100	100	100	100	#REF!	100	100	100	100	100	100	100	100	100	100	100	100	100	100	100	100	100	100	100	100
10	125.911	109.591	116.368	117.46	110.465	118.362	#REF!	119.798	120.068	127.696	137.021	145.051	150.247	112.418	110.172	150.273	130.618	143.836	129.923	117.208	113.833	112.026	138.225	129.269	132.824	110.38	111.404
20	145.127	122.706	113.421	108.602	131.395	133.898	#REF!	138.267	137.826	130.912	144.572	153.547	153.695	114.666	106.313	193.989	131.554	172.945	137.387	132.684	136.074	115.692	160.593	140.336	149.176	124.392	115.744
30	148.248	131.35	122.263	122.145	155.233	169.774	#REF!	136.557	137.76	143.442	149.732	159.326	158.97	109.301	105	207.104	127.809	200	136.422	139.015	134.056	125.624	188.559	159.092	147.252	137.561	125.26
								137.158		146.587		159.148		107.151		167.456		168.211
								137.158	146.587	159.148	107.151	167.456	168.211
